1 **Knowledge, attitudes and practices of hypertension in a community based cross sectional**  
2 **study done in Ward 14, Gwanda District, Matebeleland South, Zimbabwe.**

3

4 Pugie Tawanda Chimberengwa<sup>1\*</sup>, Mergan Naidoo<sup>1</sup>

5

6 1: Discipline of Public Health Medicine, School of Nursing and Public Health, University of

7 KwaZulu-Natal, Durban, South Africa

8 \* drchimberengwa@gmail.com

9

10

11

12

13

14

15

16

17

18

19

20 **Abstract**

21 **Background**

22 Hypertension is a significant contributor to cardiovascular and renal diseases. In poor  
23 communities there is lack of awareness, poor treatment and control. However, it can be controlled  
24 by lifestyle modifications. The aim of this study was to determine knowledge, attitudes and  
25 practices with regards to hypertension in a rural disadvantaged community in Matebeleland  
26 South province of Zimbabwe.

27 **Methods**

28 We conducted a descriptive cross-sectional survey. A pre-tested and validated interviewer  
29 administered questionnaire was used to collect demographic, awareness, treatment and control  
30 data among consenting hypertensive patients.

31 **Results**

32 304 respondents were enrolled into the study, their mean age was 59 years and 65.4% were  
33 females. Adding salt on the table (59.8%) was a risk factor. There were strong community beliefs  
34 in managing hypertension with herbs (50.7%) and use of traditional medicines (14.5%).  
35 Knowledge on hypertension was poor with 43.8% of hypertensive patients having had a  
36 discussion with a health worker on hypertension and 64.8% believing the main cause of  
37 hypertension is stress while 85.9% stated palpitations as a symptom of hypertension. Defaulter  
38 rate was high at 30.9% with 25% of those on medication not knowing whether their blood  
39 pressure control status. Odds ratio for good knowledge for secondary and tertiary education

40 were 3.68 (95%CI: 1.61-8.41) and 7.52 (95%CI: 2.76-20.46) respectively compared to no formal  
41 education. Those that believed in herbal medicines and those that used traditional medicines  
42 were 53% (95%CI: 0.29-0.76) and 68% (95%CI: 0.29-0.76) less likely to have good knowledge  
43 compared to those who did not believe and use traditional medicines respectively.

#### 44 **Conclusion**

45 Lack of education and poor socio-economic backgrounds were associated with poor knowledge  
46 on hypertension. Shortages of medication, poor health funding and weak health education  
47 platforms contributed to reduced awareness and control of hypertension in the community. Thus,  
48 community hypertension awareness, treatment and control needed to be upscaled.

49

50

51

52

53

54

55

56

57

58

## 59 **Introduction**

60 Hypertension (HT) is one of significant health challenges in low- and middle-income countries  
61 (LMICs) that are experiencing epidemiological transition from communicable to non-  
62 communicable diseases [1-3]. Hypertension is prevalent in both high income and LMICs.  
63 Together with other cardiovascular diseases, these public health problems that are strongly  
64 linked to urbanization, aging populations, westernized socio-economic sedentary lifestyles  
65 promoting excessive salt and alcohol intake, smoking, obesity as well as lack of physical exercise  
66 [4-7].

67 Hypertension is the most common incidentally diagnosed chronic disease and various factors  
68 affect diagnosis, treatment and control of HT. However, the most important barrier to diagnosis  
69 is lack of knowledge and awareness on HT and its complications [8]. Almost half of hypertension-  
70 related deaths can be averted with compliance or adherence to antihypertensive treatment [9]. It  
71 is therefore important to assess the patients' knowledge and awareness on HT because patient  
72 education is a key component in the programs and interventions designed to control HT [10].

73 Hypertension is a major risk factor for cerebro-vascular accidents as well as coronary heart  
74 diseases, with two-thirds of all cerebro-vascular accidents being attributable to poor HT control  
75 [11,12]. Cardiovascular diseases are the major cause of death globally, with an estimated 17.5  
76 million deaths per year and 80% of the deaths are recorded in LMIC [5,9]. In African communities,  
77 the challenges in managing HT lie in prevention, diagnosis and treatment [13]. There is a shortage  
78 of national data on HT prevalence studies in Zimbabwe. A study that summarized HT prevalence  
79 over a 14-year period from 1997 to 2010 estimated the pooled prevalence of HT in Zimbabwe at

80 30% [14]. In a hypertension study done in Bulawayo city, in southern Zimbabwe, the highest  
81 prevalence of 38.4% was reported [15] while an average prevalence of 17.9% was recorded among  
82 three provinces in another survey focusing on both urban and rural settings [16].

83 Significant progress has been made in improving HT awareness, treatment and control among  
84 patients living with hypertension (PLWHT). Efforts to control HT have included improving  
85 public knowledge and awareness on the risks and complications of hypertension [10]. The aim of  
86 this study was to determine the level of knowledge, attitudes and practices with regards to HT in  
87 ward 14, Gwanda district (Zimbabwe) as part of a community based participatory research  
88 (CBPR) we carried out. This paper will report on the quantitative baseline findings on the  
89 community's knowledge and awareness on hypertension.

90

## 91 **Methods**

### 92 **Study design**

93 We conducted a baseline descriptive cross-sectional study to evaluate knowledge, awareness and  
94 perceived control of hypertension.

### 95 **Study setting**

96 The survey was undertaken in Ward 14, a rural area situated about 50km south-west of Gwanda  
97 town, Matebeleland South province in Zimbabwe. Gwanda district population was 115 778  
98 inhabitants which was 16,9% of the provincial population. Ward 14 had 1384 households, 5867  
99 inhabitants of which 55% were females [20].

## 100 **Sampling and Sample size calculations**

101 Using the Dobson formula;  $n = (z^2pq)/\Delta^2$ , where  $n$  = sample size,  $z$  = standard error risk,  $p$  =  
102 prevalence of hypertension (PLWHT),  $q = 1-p$  (proportion of people without hypertension) and  
103  $\Delta$  = absolute precision. Assuming 95% CI ( $z=1.96$ ), a prevalence of HT ( $p$ ) of 27% [16], and using  
104 a precision of 5%, it was established that an adequate sample size would comprise 303 PLWHT.  
105 All consenting hypertensive patients from ward 14 drawn from Sengezane rural health center,  
106 those identified in the villages, schools and business premises and hypertensive patients that  
107 were seen at Gwanda provincial hospital (primary referral center for Sengezane clinic) whose  
108 address originated from ward 14 were enrolled into the study.

## 109 **Ethics approval and consent to participate**

110 All phases of this research were jointly approved by the Medical Research Council of Zimbabwe  
111 (MRCZ/A/2136) and the Biomedical Research Council of the University of Kwa-Zulu Natal, South  
112 Africa (BFC318/16). Authority was sought from the Ministry of Health and Child Care Zimbabwe  
113 through the Provincial Medical Director, Matebeleland South and the District Medical Officer for  
114 Gwanda. Gatekeeper's authority was sought from the Ministry of Local Government at the offices  
115 of District Administrator. The Chiefs, headmen, religious leaders, health center committee and  
116 community advisory board were approached through Ward 14 councilor. Written informed  
117 consent was sought from all research participants.

118

## 119 **Data collection**

120 Quantitative data was collected using interviewer administered questionnaires. All self-reported  
121 persons to have been diagnosed with HT in the ward qualified to be enrolled into the study. The  
122 inclusion criteria were any consenting person above the age of 18 years residing in ward 14 who  
123 reported having been diagnosed of HT regardless of whether they were taking anti-hypertensive  
124 medication or not. The exclusion criteria were any person who was hypertensive not consenting  
125 to the study and those below the age of 18 years.

126 Data collection was done by cooperative inquiry group (CIG) members. These comprised of  
127 hypertensive patients, community leaders and village health workers who were joined by nurses  
128 and the principal investigator (PI) to form the CIG. They were trained in quantitative data  
129 collection using interviewer administered questionnaires on HT knowledge, awareness,  
130 treatment and control, recording of data for standardization and uniformity including ethical  
131 issues. The PI developed the interviewer administered questionnaire which was discussed,  
132 validated and adopted by the CIG for data collection. The validation of the tool was done during  
133 a CIG meeting where the participants discussed and understood the meaning of each of the  
134 questions in the data collection tool, recording and interpretation of the responses. Each CIG  
135 member was given five copies of the questionnaire to use as a pre-test and responses were shared  
136 and agreed upon. Thereafter, a full data collection exercise over a period of 2 weeks was then  
137 commissioned. Data collected included respondents' demography, risk factors for hypertension,  
138 knowledge, attitudes, perceptions and barriers to treatment compliance.

### 139 **Statistical methods**

140 Frequencies and proportions for lifestyle related factors and knowledge were calculated as well  
141 as specific proportions for age, marital status, income and level of education. The proportion of  
142 hypertensive patients who were aware of their diagnosis, receiving treatment, BP control was  
143 determined including time of last BP measurement. The proportion of hypertensive patients on  
144 treatment to those aware of their blood pressure control was assessed. Ten key questions on  
145 hypertension knowledge and practice were recoded and good knowledge was ascertained by  
146 getting at least six questions correct respectively while getting more than three correct questions  
147 was regarded as good attitude. This was used for bivariate logistic regression analysis to analyze  
148 factors influencing hypertension. Data was analyzed using Microsoft excel, Stata and Epi-Info 7  
149 software.

#### 150 **Study validity and bias**

151 Selection bias was reduced in the study by ensuring high participation rates. We enrolled almost  
152 all possible hypertensive patients in the ward to approximate the whole population of PLWHT.  
153 Interviewer bias was reduced by using trained CIG members who had standardized  
154 questionnaires. To reduce reporting bias, the respondents were asked for the signs and symptoms  
155 of HT they knew instead of selecting from a list. The participation of GIG members drawn from  
156 the community for data collection while embedding questions on specific lifestyles and putting  
157 less emphasis on non-desirable social habits reduced social desirability and information bias. In  
158 instances, where clinic records were available, they were utilized for triangulation and to reduce  
159 information bias.

160

161 **Results**

162 A total of 304 PLWHT were enrolled into and participated in the study and the mean age of the  
163 participants was 59 (Q1-Q3; 46-72) years. Table 1 shows the sociodemographic data for  
164 hypertensive patients who were enrolled into the study.

165 **Table 1; Socio-demographic data and lifestyle related factors for PLWHT; ward 14, Gwanda**  
166 **district; community-based action research project, May 2017.**

---

| <b>Demographic profiles of respondents</b> |                         |
|--------------------------------------------|-------------------------|
| <i>Characteristic</i>                      | <i>Frequency, n (%)</i> |
| Gender                                     |                         |
| <i>Male</i>                                | 108(35.5)               |
| <i>Female</i>                              | 196(64.5)               |
| Marital status                             |                         |
| <i>Single</i>                              | 30(9.9)                 |
| <i>Married</i>                             | 179(58.9)               |
| <i>Widowed</i>                             | 71(23.4)                |
| <i>Divorced</i>                            | 24(7.9)                 |
| Religion                                   |                         |
| <i>Apostolic</i>                           | 7(2.3)                  |
| <i>African religion</i>                    | 37(12.2)                |
| <i>Christianity</i>                        | 257(84.5)               |

---

|               |        |
|---------------|--------|
| <i>Muslim</i> | 2(0.7) |
| <i>Other</i>  | 1(0.3) |

|                                   |           |
|-----------------------------------|-----------|
| <b>Level of education (n=303)</b> |           |
| <i>None</i>                       | 33(10.9)  |
| <i>Primary</i>                    | 122(40.3) |
| <i>Secondary</i>                  | 95(31.4)  |
| <i>Tertiary</i>                   | 53(17.5)  |

|                                |          |
|--------------------------------|----------|
| <b>Job description (n=144)</b> |          |
| <i>Skilled</i>                 | 56(38.9) |
| <i>Unskilled</i>               | 88(61.1) |

|                       |           |
|-----------------------|-----------|
| <b>Monthly income</b> |           |
| <i>&lt;100</i>        | 40(13.2)  |
| <i>100-300</i>        | 43(14.1)  |
| <i>&gt;300</i>        | 63(20.7)  |
| <i>Not declared</i>   | 158(52.0) |

**Life style related factors of participants**

| <i>Factor</i> | <i>Frequency, n (%)</i> |
|---------------|-------------------------|
|---------------|-------------------------|

|                       |          |
|-----------------------|----------|
| Ever consumed alcohol | 76(25.0) |
|-----------------------|----------|

|                                   |          |
|-----------------------------------|----------|
| <b>Alcohol consumption (n=76)</b> |          |
| <i>1-3 days/month</i>             | 26(34.2) |
| <i>1-4 days/week</i>              | 25(32.9) |

|                                                    |           |
|----------------------------------------------------|-----------|
| <i>5+ days/week</i>                                | 12(15.8)  |
| <i>Less than once per month</i>                    | 13(17.1)  |
| Ever smoked cigarettes                             | 36(11.8)  |
| Current cigarette smoker (n=36)                    | 15(41.7)  |
| Fruit consumption for more than 3 days a week      | 224(73.7) |
| Vegetables consumption for more than 3 days a week | 296(97.4) |
| Adding salt on table                               | 179(58.9) |
| Cooking oil source                                 |           |
| <i>Margarine</i>                                   | 1(0.3)    |
| <i>Peanut butter</i>                               | 38(12.5)  |
| <i>Vegetable oil</i>                               | 264(86.8) |

167

168 The study sample consisted of 196 (64.5%) females and 108 (35.5%) men. Most respondents  
 169 (47%) were above the age of 60 while only 3% were below the age of 30. The respondents were  
 170 predominantly Christians 84.5% while the African tradition was observed by 12.2%. In terms of  
 171 formal education, 51.2% attempted primary level or below with about 11% having not attended  
 172 primary school at all. Fifty two percent of the respondents did not declare their family monthly  
 173 income with only 21% declaring monthly family income above US\$ 300. As shown in Table 1,  
 174 75% of respondents did not drink alcohol with only 25% reported to have used alcohol mainly  
 175 as social drinkers and 12% had ever smoked. Twenty four percent ate fruits on more three days  
 176 per week, 67% ate vegetables on more than three days a week while 60% reportedly added salt  
 177 on the table. Vegetable oil was used for cooking by 87% of respondents.

178 **Knowledge and beliefs on HT**

179 Table 2 shows the respondents' knowledge and beliefs on HT treatment and control among  
 180 respondents.

181 **Table 2; Knowledge and beliefs on hypertension, treatment and control among HT patients in**  
 182 **ward 14, Gwanda district community-based action research project on hypertension, May 2017**

| Knowledge category                                                                                                 | Frequency, n (%) |
|--------------------------------------------------------------------------------------------------------------------|------------------|
| Positive family history of hypertension                                                                            | 204(67.1)        |
| Positive family history of known hypertension complications                                                        | 116(39.3)        |
| Belief in effectiveness blood pressure pills to manage HT                                                          | 285(93.8)        |
| Belief in herbal remedies to manage HT                                                                             | 153(50.7)        |
| Agree to using African medicines to manage HT                                                                      | 44(14.5)         |
| Can use traditional medicines to control your blood pressure                                                       | 44(14.5)         |
| <b>Source of knowledge on high blood pressure</b>                                                                  |                  |
| <i>Local clinic nurse</i>                                                                                          | 172(56.6)        |
| <i>Village health worker</i>                                                                                       | 35(11.5)         |
| <i>Public hospital</i>                                                                                             | 55(18.1)         |
| <i>Private doctor</i>                                                                                              | 33(10.9)         |
| <i>Other</i>                                                                                                       | 9(3.0)           |
| Has a health worker / village health worker ever discussed<br>with you about blood pressure treatment and control? | 133(43.8)        |

What are the causes of blood pressure?

|                   |           |
|-------------------|-----------|
| <i>Drugs</i>      | 16(5.3)   |
| <i>Old age</i>    | 23(7.6)   |
| <i>Stress</i>     | 197(64.8) |
| <i>Witchcraft</i> | 18(5.9)   |
| <i>Unknown</i>    | 48(145.8) |
| <i>Other</i>      | 2(0.7)    |

What are the signs and symptoms of high blood pressure?

|                     |           |
|---------------------|-----------|
| <i>Asymptomatic</i> | 22(7.2)   |
| <i>Headache</i>     | 1(0.3)    |
| <i>Palpitations</i> | 261(85.9) |
| <i>Other</i>        | 8(2.6)    |
| Don't know          | 12(4.0)   |

Can one have high blood pressure without any signs and symptoms? 161(53.0)

What are the consequences of untreated blood pressure?

|                                              |           |
|----------------------------------------------|-----------|
| <i>Stroke, Heart failure, Kidney failure</i> | 278(91.4) |
| <i>Other</i>                                 | 7(2.3)    |
| <i>Don't know</i>                            | 19(6.3)   |

What are the risk factors for developing high blood pressure?

|                   |         |
|-------------------|---------|
| <i>Hereditary</i> | 10(3.3) |
|-------------------|---------|

|                   |           |
|-------------------|-----------|
| <i>Diet</i>       | 253(83.2) |
| <i>Don't know</i> | 41(13.5)  |

183

184 Family history of HT was reported by 67% of respondents while 39% agreed to knowing a  
185 hypertensive family member who developed complications of HT. Ninety four percent believed  
186 tablets lower blood pressure and 51% also believed in the use of traditional remedies to lower  
187 blood pressure while 15% confessed to visiting traditional healers for blood pressure treatment.  
188 The local clinic nurse was primarily the source of knowledge on HT for 57% of the respondents  
189 while the VHW was consulted by only 12%. Forty four percent reported having discussed blood  
190 pressure treatment control with a health worker or a VHW.

191 Stress was reportedly cited as the commonest cause (64.8%) of HT and 16.8% reported that HT  
192 causes were unknown. Palpitations were thought to be the commonest symptom of HT by 85.9%  
193 of respondents while only 7.2% stated that HT was asymptomatic and 4% did not know. Fifty  
194 three percent of respondents agreed that one can have HT without presenting any signs and  
195 symptoms. Death, stroke, heart and kidney failure were cited as the commonest complications of  
196 poorly controlled or untreated HT. Diet was singled out as the commonest risk factor for HT  
197 (83.2%) with heredity being mentioned by 3.3% and 13.5% of respondent could not state any risk  
198 factor for HT.

### 199 **Attitudes and practices on HT**

200 Table 3 shows the attitudes and practices of respondents on the control of HT, their preferred  
201 service providers and access areas for follow up.

202 **Table 3; Attitudes and practices on treatment and control of HT in ward 14, Gwanda district**  
 203 **community-based action research project on hypertension, May 2017**

| <b>Treatment and control</b>                                      | <b>Frequency, n (%)</b> |
|-------------------------------------------------------------------|-------------------------|
| <b>How do you currently control your blood pressure?</b>          |                         |
| <i>Blood pressure tablets</i>                                     | 260(85.5)               |
| <i>Traditional medicines</i>                                      | 27(8.8)                 |
| <i>Prayer</i>                                                     | 9(3.0)                  |
| <i>Other</i>                                                      | 8(2.6)                  |
| those currently taking medication for hypertension                | 250(82.2)               |
| Taken medication regularly in the past 2 weeks (n=250)            | 229(91.6)               |
| Those having challenges with taking hypertensive treatment        | 58(19.1)                |
| <b>Preferred place of followed up for hypertension management</b> |                         |
| <i>Local clinic</i>                                               | 159(52.3)               |
| <i>Public hospital</i>                                            | 48(15.8)                |
| <i>Private doctor</i>                                             | 49(16.1)                |
| <i>My home</i>                                                    | 13(4.3)                 |
| <i>Other</i>                                                      | 3(1.0)                  |
| <i>Not stated</i>                                                 | 32(10.5)                |
| <b>When last was your blood pressure checked?</b>                 |                         |
| <i>&lt; 1 month ago</i>                                           | 152(50.0)               |
| <i>2-4 months ago</i>                                             | 63(20.7)                |

|                                                                   |           |
|-------------------------------------------------------------------|-----------|
| <i>&gt; 4 months ago</i>                                          | 58(19.1)  |
| <i>Missing</i>                                                    | 31(10.2)  |
| <b>Is your blood pressure well controlled?</b>                    |           |
| <i>Yes</i>                                                        | 196(64.5) |
| <i>No</i>                                                         | 32(10.5)  |
| <i>Don't know</i>                                                 | 46(15.1)  |
| <i>Not stated</i>                                                 | 30(9.9)   |
| Ever defaulted hypertensive medication                            | 94(30.9)  |
| <b>Reasons for defaulting treatment (n=93)</b>                    |           |
| Had developed side effects from medicines                         | 11(11.8)  |
| Tablets make me sick                                              | 7(7.5)    |
| To avoid addiction                                                | 11(11.8)  |
| Treatment was not effective                                       | 14(15.1)  |
| Trying alternative remedies                                       | 16(17.2)  |
| Feeling much better                                               | 26(28.0)  |
| Other                                                             | 8(8.6)    |
| Agreed to use of traditional medicines to control blood pressure? | 44(14.5)  |

204

205 The majority (85.5%) reported that they were using BP tablets to control their HT while 8.8% used  
 206 African traditional medicines. Eighty two percent respondents reported that they were currently  
 207 taking the tablets and of these, 91.6% said they had been swallowing the tablets in the preceding

208 2 weeks while 19.1% cited facing challenges with compliance to treatment during the same time  
209 period. The local clinic (52.3%), private doctor (16.1%) and the public hospital (15.8%) were the  
210 places where respondents were being followed up for continued care. Fifty percent reported they  
211 had a BP reading checked within the preceding month while 10.2% did not know when they last  
212 checked and 19.1% had checked more than 4 months prior. With regards to blood pressure  
213 control, 64.5% stated that they had well controlled blood pressure, 10.5% knew they had poorly  
214 controlled while 25% did not know and 31% had ever defaulted treatment. Feeling much better  
215 (27.6%), assuming treatment was not effective (14.9%), avoiding addiction (11.7%) and  
216 experiencing side effects of HT medication (11.7%) were some of the commonest excuses given  
217 for defaulting treatment. A significant 14% agreed that they can rely on traditional medicines to  
218 control blood pressure.

### 219 **Regression analysis**

220 Table 4 shows a logistic regression analysis of factors affecting knowledge on hypertension. Data  
221 was recoded such that those who had scored six or more out of ten on knowledge and practice  
222 scores were deemed to have good knowledge and good practice respectively whilst, a score of  
223 three or more out of five was deemed good attitude towards HT treatment and control.

224 **Table 4; Regression analysis of factors affecting hypertension knowledge in ward 14, Gwanda**  
225 **district community-based action research project on hypertension, May 2017**

---

| Factor | Hypertension<br>knowledge/awareness | OR (95% CI) |
|--------|-------------------------------------|-------------|
|--------|-------------------------------------|-------------|

---

|                                              | Yes(n=196) | No(n=108) |                      |
|----------------------------------------------|------------|-----------|----------------------|
| <b>Gender</b>                                |            |           |                      |
| <i>Female</i>                                | 125        | 71        | Ref                  |
| <i>Male</i>                                  | 71         | 37        | 1.09(0.67-1.78)      |
| <b>Religion</b>                              |            |           |                      |
| <i>Apostolic</i>                             | 6          | 1         | 3.23(0.38-27.28)     |
| <i>African religion</i>                      | 20         | 17        | 0.63(0.32-1.27)      |
| <i>Christianity</i>                          | 167        | 90        | Ref                  |
| <i>Muslim/other</i>                          | 3          | 0         | -                    |
| <b>Level of education (n=303)</b>            |            |           |                      |
| <i>None</i>                                  | 13         | 20        | Ref                  |
| <i>Primary</i>                               | 71         | 51        | 2.14(0.98-4.70)      |
| <i>Secondary</i>                             | 67         | 28        | 3.68(1.61-8.41) **   |
| <i>Tertiary</i>                              | 44         | 9         | 7.52(2.76-20.46) *** |
| <b>Job description (n=144)</b>               |            |           |                      |
| <i>Skilled</i>                               | 45         | 11        | Ref                  |
| <i>Unskilled</i>                             | 59         | 29        | 0.50(0.22-1.10)      |
| Adding salt on table                         | 110        | 69        | 0.72(0.45-1.17)      |
| Family history of hypertension               | 133        | 71        | 1.10(0.69-1.81)      |
| Family history of hypertension complications | 78         | 38        | 1.11(0.68-1.83)      |

|                                                        |     |    |                    |
|--------------------------------------------------------|-----|----|--------------------|
| Belief in blood pressure pills                         | 187 | 98 | 2.12(0.83-5.39)    |
| Belief in herbal remedies                              | 86  | 67 | 0.47(0.29-0.76) ** |
| Agree to using African medicines                       | 18  | 26 | 0.32(0.17-0.61) ** |
| Source of knowledge on high blood pressure             |     |    |                    |
| <i>Local clinic nurse</i>                              | 107 | 65 | 0.51(0.25-1.02)    |
| <i>Village health worker</i>                           | 18  | 17 | 0.33(0.13-0.81) *  |
| <i>Public hospital</i>                                 | 42  | 13 | Ref                |
| <i>Private doctor</i>                                  | 29  | 4  | 2.24(0.66-7.57)    |
| <i>Other</i>                                           | 0   | 9  | -                  |
| How do you currently control your blood pressure?      |     |    |                    |
| <i>Blood pressure tablets</i>                          | 176 | 84 | Ref                |
| <i>Traditional medicines</i>                           | 10  | 17 | 0.28(0.12-0.64) *  |
| <i>Prayer</i>                                          | 5   | 4  | 0.60(0.16-2.28)    |
| <i>Other</i>                                           | 5   | 3  | 0.80(0.19-3.41)    |
| Taken medication regularly in the past 2 weeks (n=250) | 152 | 78 | 0.89(0.40-1.96)    |
| Challenges with taking hypertensive treatment          | 36  | 22 | 0.79(0.43-1.45)    |

---

Place preferred being followed up

for hypertension management

|                        |     |    |                   |
|------------------------|-----|----|-------------------|
| <i>Local clinic</i>    | 107 | 52 | Ref               |
| <i>Public hospital</i> | 33  | 15 | 1.07(0.53-2.14)   |
| <i>Private doctor</i>  | 36  | 13 | 1.35(0.66-2.75)   |
| <i>My home</i>         | 5   | 8  | 0.30(0.09-0.97) * |
| <i>Other</i>           | 1   | 2  | 0.24(0.02-2.74)   |
| <i>Not stated</i>      | 14  | 18 | 0.38(0.17-0.82) * |

Last blood pressure check

|                          |     |    |                   |
|--------------------------|-----|----|-------------------|
| <i>&lt; 1 month ago</i>  | 109 | 43 | Ref               |
| <i>2-4 months ago</i>    | 37  | 26 | 0.56(0.30-1.04)   |
| <i>&gt; 4 months ago</i> | 37  | 21 | 0.70(0.37-1.32)   |
| <i>Missing</i>           | 13  | 18 | 0.28(0.13-0.63) * |

Blood pressure controlled

|                   |     |    |                    |
|-------------------|-----|----|--------------------|
| <i>Yes</i>        | 135 | 61 | Ref                |
| <i>No</i>         | 24  | 8  | 1.36(0.58-3.19)    |
| <i>Don't know</i> | 25  | 21 | 0.54(0.28-1.03)    |
| <i>Not stated</i> | 12  | 18 | 0.30(0.14-0.66) ** |

|                           |    |    |                 |
|---------------------------|----|----|-----------------|
| Ever defaulted medication | 58 | 36 | 0.72(0.43-1.22) |
|---------------------------|----|----|-----------------|

Factor

Positive attitude

OR (95% CI)

Yes(n=266)

No(n=38)

---

|                                              |     |    |                        |
|----------------------------------------------|-----|----|------------------------|
| <b>Gender</b>                                |     |    |                        |
| <i>Female</i>                                | 175 | 21 | Ref                    |
| <i>Male</i>                                  | 91  | 17 | 0.64(0.32-1.28)        |
| <b>Religion</b>                              |     |    |                        |
| <i>Apostolic</i>                             | 6   | 1  | 0.53(0.06-4.65)        |
| <i>African religion</i>                      | 21  | 16 | 0.12(0.05-0.26) ***    |
| <i>Christianity</i>                          | 236 | 21 | Ref                    |
| <i>Muslim/other</i>                          | 3   | 0  | -                      |
| <b>Level of education (n=303)</b>            |     |    |                        |
| <i>None</i>                                  | 24  | 9  | Ref                    |
| <i>Primary</i>                               | 108 | 14 | 2.89(1.12-7.46) *      |
| <i>Secondary</i>                             | 84  | 11 | 2.86(1.06-7.71) *      |
| <i>Tertiary</i>                              | 49  | 4  | 4.59(1.28-16.44) *     |
| <b>Job description (n=144)</b>               |     |    |                        |
| <i>Skilled</i>                               | 51  | 5  | Ref                    |
| <i>Unskilled</i>                             | 75  | 13 | 0.57(0.19-1.68)        |
| Adding salt on table                         | 150 | 29 | 0.40(0.18-0.88) *      |
| Family history of hypertension               | 176 | 28 | 0.70(0.32-1.50)        |
| Family history of hypertension complications | 102 | 14 | 1.07(0.53-2.18)        |
| Belief in blood pressure pills               | 261 | 24 | 30.45(10.10-91.79) *** |

---

Source of knowledge on high blood

pressure

|                       |     |    |                    |
|-----------------------|-----|----|--------------------|
| Local clinic nurse    | 159 | 13 | 1.17(0.36-3.84)    |
| Village health worker | 30  | 5  | 2.39(0.96-5.95)    |
| Public hospital       | 46  | 9  | Ref                |
| Private doctor        | 30  | 3  | 1.96(0.49-7.82)    |
| Other                 | 1   | 8  | 0.02(0.00-0.22) ** |

Currently control your blood

pressure

|                               |     |    |                     |
|-------------------------------|-----|----|---------------------|
| <i>Blood pressure tablets</i> | 244 | 16 | Ref                 |
| <i>Traditional medicines</i>  | 9   | 18 | 0.03(0.01-0.08) *** |
| <i>Prayer</i>                 | 9   | 0  | -                   |
| <i>Other</i>                  | 4   | 4  | 0.07(0.01-0.29) *** |

Taken medication regularly in the

|  |     |    |                  |
|--|-----|----|------------------|
|  | 216 | 14 | 7.41(3.58-15.33) |
|--|-----|----|------------------|

past 2 weeks

Challenges with taking hypertensive

|  |    |    |                    |
|--|----|----|--------------------|
|  | 47 | 11 | 0.18(0.07-0.48) ** |
|--|----|----|--------------------|

treatment

Last blood pressure check

|                |     |    |                     |
|----------------|-----|----|---------------------|
| < 1 month ago  | 145 | 7  | Ref                 |
| 2-4 months ago | 60  | 3  | 0.97(0.24-3.86)     |
| > 4 months ago | 43  | 15 | 0.14(0.05-0.36) *** |

---

|                                   |                      |           |                     |
|-----------------------------------|----------------------|-----------|---------------------|
| <i>Missing</i>                    | 18                   | 13        | 0.07(0.02-0.19) *** |
| <b>Blood pressure controlled</b>  |                      |           |                     |
| <i>Yes</i>                        | 189                  |           | Ref                 |
| <i>No</i>                         | 29                   |           | 0.36(0.09-1.46)     |
| <i>Don't know</i>                 | 31                   |           | 0.08(0.03-0.20) *** |
| <i>Not stated</i>                 | 17                   |           | 0.05(0.02-0.14) *** |
| <b>Ever defaulted medication</b>  | 191                  | 19        | 2.55(1.28-5.08) **  |
| <b>Factor</b>                     | <b>Good practice</b> |           | <b>OR (95% CI)</b>  |
|                                   | Yes(n=131)           | No(n=173) |                     |
| <b>Gender</b>                     |                      |           |                     |
| <i>Female</i>                     | 71                   | 125       | Ref                 |
| <i>Male</i>                       | 60                   | 48        | 2.20(1.36-3.55) **  |
| <b>Religion</b>                   |                      |           |                     |
| <i>Apostolic</i>                  | 4                    | 3         | 1.75(0.38-8.00)     |
| <i>African religion</i>           | 15                   | 22        | 0.90(0.44-1.81)     |
| <i>Christianity</i>               | 111                  | 146       | Ref                 |
| <i>Muslim/other</i>               | 1                    | 2         | 0.66(0.06-7.35)     |
| <b>Level of education (n=303)</b> |                      |           |                     |
| <i>None</i>                       | 7                    | 26        | Ref                 |
| <i>Primary</i>                    | 42                   | 80        | 1.95(0.78-4.87)     |
| <i>Secondary</i>                  | 49                   | 46        | 3.96(1.57-9.99) **  |

|                                            |     |     |                     |
|--------------------------------------------|-----|-----|---------------------|
| <i>Tertiary</i>                            | 32  | 21  | 5.66(2.08-15.38) ** |
| Job description (n=144)                    |     |     |                     |
| <i>Skilled</i>                             | 37  | 19  | Ref                 |
| <i>Unskilled</i>                           | 37  | 51  | 0.37(0.19-0.75) **  |
| Family history of HT                       | 99  | 105 | 2.00(1.21-3.31) **  |
| Family history of HT complications         | 58  | 58  | 1.59(0.99-2.56)     |
| Belief in blood pressure pills             | 128 | 157 | 4.35(1.24-15.25)    |
| Belief in herbal remedies                  | 62  | 91  | 0.81(0.51-1.28)     |
| Agree to using African medicines           | 14  | 30  | 0.57(0.29-1.13)     |
| Source of knowledge on high blood pressure |     |     |                     |
| <i>Local clinic nurse</i>                  | 66  | 106 | 0.60(0.33-1.11)     |
| <i>Village health worker</i>               | 15  | 20  | 0.72(0.31-1.70)     |
| <i>Public hospital</i>                     | 28  | 27  | Ref                 |
| <i>Private doctor</i>                      | 22  | 11  | 1.93(0.79-4.73)     |
| <i>Other</i>                               | 0   | 9   | -                   |
| Currently control your blood pressure      |     |     |                     |
| <i>Blood pressure tablets</i>              | 127 | 133 | Ref                 |
| <i>Traditional medicines</i>               | 3   | 24  | 0.13(0.04-0.45) **  |
| <i>Prayer</i>                              | 0   | 9   | -                   |

|                                                     |     |     |                      |
|-----------------------------------------------------|-----|-----|----------------------|
| <i>Other</i>                                        | 1   | 7   | 0.15(0.02-1.23)      |
| Taken medication regularly in the past 2 weeks      | 122 | 108 | 8.16(3.89-17.16) *** |
| Challenges with taking HT treatment (n=252)         | 22  | 36  | 0.56(0.31-1.03)      |
| Place preferred being followed up for HT management |     |     |                      |
| <i>Local clinic</i>                                 | 69  | 90  | Ref                  |
| <i>Public hospital</i>                              | 22  | 26  | 1.10(0.58-2.11)      |
| <i>Private doctor</i>                               | 35  | 14  | 3.26(1.63-6.53) **   |
| <i>My home</i>                                      | 2   | 11  | 0.24(0.05-1.11)      |
| <i>Other</i>                                        | 0   | 3   | -                    |
| <i>Not stated</i>                                   | 3   | 29  | 0.13(0.04-0.46) **   |
| Last blood pressure check                           |     |     |                      |
| <i>&lt; 1 month ago</i>                             | 86  | 66  | Ref                  |
| <i>2-4 months ago</i>                               | 33  | 30  | 0.84(0.47-1.52)      |
| <i>&gt; 4 months ago</i>                            | 9   | 49  | 0.14(0.06-0.31) ***  |
| <i>Missing</i>                                      | 3   | 28  | 0.08(0.02-0.28) ***  |
| Blood pressure controlled                           |     |     |                      |
| <i>Yes</i>                                          | 110 | 86  | Ref                  |
| <i>No</i>                                           | 12  | 20  | 0.47(0.22-1.01)      |

|                                   |    |    |                     |
|-----------------------------------|----|----|---------------------|
| <i>Don't know</i>                 | 6  | 40 | 0.12(0.05-0.29) *** |
| <i>Not stated</i>                 | 3  | 27 | 0.09(0.03-0.30) *** |
| Ever defaulted medication (n=272) | 40 | 54 | 0.76(0.46-1.25)     |

226 Key: \*Significant at  $\alpha=0.05$ , \*\*Significant at  $\alpha=0.01$ , \*\*\*Significant at  $\alpha=0.001$ , Ref = Reference against  
 227 which other categories were measured against

228

229 In relation to knowledge, those who attained tertiary education and secondary education were  
 230 7.52 (95%CI:2.76-20.46) and 3.68 (95%CI;1.61-8.41) more likely to have better knowledge than  
 231 those who had no formal education respectively. Those that believed in herbal medicines and  
 232 those that used African traditional medicines were 53% (95%CI:0.29-0.76) and 68% (95%CI:0.29-  
 233 0.76) less likely to have good knowledge compared to those who did not believe and use  
 234 traditional medicines respectively.

235 As far as attitude and practice are concerned, taking Christianity as the standard, those that  
 236 believe in African religion were 88% (95%CI: 0.05-0.26); less likely to have their blood pressure  
 237 controlled. There were benefits of education and attitude improved with level of education.  
 238 Attaining secondary education and tertiary education is 2.86 (95%CI: 1.06-7.71) and 4.59 (95%CI:  
 239 1.28-16.44) more likely to have a positive attitude towards hypertension as compared to  
 240 respondents that have not received formal education. Those that added salt on the table were  
 241 60% (95%CI: 0.18-0.88) less likely to have their blood pressure controlled compared to those that  
 242 did not. Those who believed in the use of blood pressure tablets for controlling HT were 30.45  
 243 (95% CI: 10.10-91.79) more likely to have their blood pressure controlled as compared to those

244 who did not while those who controlled their blood pressure with traditional medicines were  
245 97% (95%CI: 0.01-0.08) less likely to have their blood pressure controlled.

246 Those who confessed having challenges with taking hypertensive treatment were 82% (95%CI:  
247 0.07-0.48) less likely to have their blood pressure controlled. With regards to practice, those with  
248 a family history of hypertension were 2.00 (95%CI: 1.21-3.31) more likely to have their blood  
249 pressure controlled while those that took medication regularly in the preceding two weeks were  
250 8.16 (95%CI: 3.89-17.16) more likely to have their blood pressure controlled. There were no  
251 statistically significant differences in knowledge across gender, religion and whether  
252 respondents were skilled or not in their jobs.

253

## 254 **Discussion**

255 The majority (65%) of PLWHT in this community were females as compared to the men. Some  
256 studies reported that hypertension was noted to be prevalent more commonly in females linked  
257 with unhealthy diets in low income countries [14]. These findings are similar to most studies on  
258 HT awareness treatment and control where women participants were more than men, however  
259 both genders are represented [21]. More than half of the participants (51%) were not educated  
260 beyond primary school and 11% had no formal education at all. In a community where formal  
261 education is low and the persons afflicted by disease are vulnerable due to socio-economic factors,  
262 poor health seeking behaviors are common. Educational attainment was directly proportional to  
263 knowledge on hypertension as those with tertiary education had better knowledge as compared

264 to those without formal education. Thus, those diagnosed may not have access to treatment and  
265 may not be able to successfully control their illness over the long term due to poverty.

266 This study was conducted in a rural disadvantaged community where supposedly there is little  
267 money to spend on health. Basing on observations and declaration of income, most of the  
268 respondents were poor and out of pocket health financing was a challenge. Low family incomes  
269 could also explain the reduced pattern for abuse of alcohol and tobacco in the community.  
270 Similarly, the consumption of fruits was low as they relied mainly on seasonal wild fruits,  
271 however vegetable consumption was high on four or more days a week (67%) as they were the  
272 commonly available relish. There was an identified risk of consuming too much salt with food  
273 (59%) in the community. The Zimbabwe's National Health Strategy (2009-2013) reported the  
274 increase in hypertension prevalence mainly attributed to high salt diet, lack of exercise, tobacco  
275 smoking and excess alcohol intake [22].

276 Value beliefs and practices of an ethnic or racial group within a community can influence  
277 acceptance and adherence to health messages as advised by clinicians and academic researchers  
278 [19]. The majority of respondents were above 60 years of age and an identified risk factor was  
279 family history of hypertension (67%). The majority (94%) believed in using tablets for controlling  
280 HT although there are deep beliefs in the use of herbs (51%) and traditional medicines (15%)  
281 which influenced their health seeking behavior. We noted that those that had belief in herbs and  
282 used traditional medicines had poor knowledge on hypertension and this could contribute to  
283 continued myths and misconceptions on hypertension and ultimately poor community  
284 outcomes. Although not statistically significant, the older patients were more aware of their

285 hypertensive status; however, studies have shown that this does not universally translate to better  
286 hypertension control [21]. This information provides a launchpad for developing community-  
287 based hypertension health packages targeted at correcting existing myths, misconceptions and  
288 misinformation for improved hypertension management.

289 There was generally poor knowledge on the risk factors, causes and awareness on hypertension  
290 among PLWHT. Most respondents (65%) believed that HT was caused by stress and 17% only  
291 knew that the cause is largely unknown. Palpitations were reported as the commonest symptom  
292 of HT by 86% of respondents while 7% said it was asymptomatic. It was unanimous among  
293 respondents that death was the ultimate outcome of uncontrolled HT. Poverty, ignorance, a poor  
294 educational background and weak community health education platforms were determinants of  
295 poor knowledge. Significant socio-economic disparities influence the level of HT awareness,  
296 treatment and control in LMIC [23]. To compound the knowledge problem in the community, the  
297 VHWs were not actively involved in the hypertension care loop.

298 Hypertension rarely has attributable signs and symptoms in the early stages and many people go  
299 undiagnosed [12]. The lack of symptoms for patients with HT contributes to both lack of  
300 awareness and reduced compliance to treatment. The improvement in HT control cannot be  
301 measurable by symptom relief, thus there is no perceptible benefits for the individual. It is known  
302 that hypertension awareness in Zimbabwe is low and this has an impact in low diagnosis,  
303 treatment and control hence there is need for a specific policy for prevention and control of  
304 hypertension in Zimbabwe [24]. Evidence has shown that even in high income countries,

305 hypertension awareness remains a challenge with 50% of the population being aware of their  
306 status and this is estimated to be 40% in LMIC [25-27].

307 Improved knowledge on hypertension should focus on primary prevention as this is cost effective  
308 in low resource settings. Diet (83%) was singled out as the commonest risk factor in developing  
309 HT, however 14% had no knowledge of risk factors for HT. Primary prevention reduces the  
310 expenses on medical care and the resultant complications of high blood pressure. Awareness  
311 screening programs, skills training and capacity building of health workforce on how to deal with  
312 hypertension and its associated risk factors including access to low cost antihypertensive  
313 medicines are key for developing countries with limited resources [28]. It was noted that 65% of  
314 those who took medication perceived that they had well controlled blood pressure however we  
315 found out that their scale of measurement was based on experiencing or perceived  
316 “complications” rather than blood pressure readings.

317 In Zimbabwe there are limited national studies on hypertension prevalence while there is lack of  
318 infrastructure to enable and support hypertension surveillance [14]. This was evident in that more  
319 than 30% of respondents had last checked their blood pressure for more than 4 months while  
320 some had lost track of when they had a BP checked. The local clinic was the only place where a  
321 blood pressure machine was found however, sometimes the services would be unavailable to  
322 various logistical reasons. This then calls for concerted efforts to prioritize service delivery, and  
323 funding for HT consumables. Special priority and focus should be on the crafting policy and  
324 research-based implementation of tailor-made service delivery packages to reduce hypertension  
325 related morbidity and mortality [21].

326 Nurses were pivotal as a source of HT health (57%) while only 12% reported that they would  
327 approach VHWs. A high defaulting rate among of 31% was possibly due to recurrent stock-outs  
328 of antihypertensive medicines at the local clinic. Hypertension affects populations negatively in  
329 low- and middle-income countries where health systems are weak [11,12,29]. Shortages of  
330 medication coupled with long travelling distances to the health facility contributed to poor  
331 hypertension outcomes; these findings are reported in other studies as well [21,30,31]. These  
332 challenges needed be addressed through primary prevention health education strategies on;  
333 treatment compliance, side effects and HT complications while making use of VHWs in  
334 community HT care. Several studies indicate that most Africans pay out of pocket for their health  
335 bills and these are supplemented by free services subsidized by donors and local governments.  
336 However, most of these resources are channeled towards communicable diseases leaving NCDs  
337 with little funding [32].

338 The study had several limitations as there is no standardized instrument to measure HT  
339 knowledge, attitudes and practices. We therefore used literature, community knowledge and  
340 field experiences to design our data collection tools which may not have been exhaustive. The  
341 algorithm used for data collection left some chance of missing hypertensive patients or enrolling  
342 patients who may not have been diagnosed of hypertension. It is possible that recruitment bias  
343 could have been introduced in that all participants were self-reported hypertensive patients and  
344 there was no rigorous verification of hypertension diagnosis.

345 The study findings were used to identify gaps in knowledge, attitudes and practices including  
346 myths and misconceptions by hypertensive patients, village health workers and the community

347 at large on hypertension. These were then used to develop the methodology for the  
348 implementation phase of the community participatory action research (CBPR) study we  
349 conducted (these study findings were published in a separate paper) [33]. The CIG validated the  
350 study findings, and they then used these during the action reflection cycles for planning and  
351 learning purposes. Subsequently, the implementation of new community strategies for improved  
352 primary prevention of hypertension in the CBPR study [33], were informed by the findings in this  
353 baseline quantitative study. Thus, by implication recommendations of improved service delivery  
354 from the hypertension CBPR study were influenced partly by the findings in this study.

355

## 356 **Conclusion**

357 Poverty related socio-economic determinants were associated with poor knowledge on  
358 hypertension. Health services factors such as medication shortages at the rural health center, poor  
359 funding and weak health education platforms were noted in the community. These contributed  
360 to reduced awareness and control of hypertension in the community. Concerted efforts were  
361 needed to deliberately create community hypertension awareness utilizing community members.  
362 Building health worker infrastructure and capacity on hypertension care and an enabling  
363 environment for improved disease surveillance for primary prevention of hypertension will  
364 benefit disadvantaged communities.

365

## 366 **Acknowledgements**

367 The authors acknowledge the CIG members who participated in this study by adapting it to the  
368 community needs of Ward 14 in Gwanda District, Matebeleland South, Zimbabwe. We also  
369 acknowledge hypertensive patients who participated in Phase 1 and all the community members  
370 of Ward 14 and Vasco Chikwasha the biostatistician who did in-depth data analysis.

### 371 **Authors' contributions**

372 Pugie Tawanda Chimberengwa and Mergan Naidoo (University of Kwa Zulu-Natal) were  
373 responsible for conceptualizing the paper. Pugie Tawanda Chimberengwa collected data and  
374 wrote the initial manuscript. Mergan Naidoo supervised the study, reviewed and edited the  
375 manuscript.

376

### 377 **References**

- 378 1. Narayan KV, Ali MK, Koplan JP. Global noncommunicable diseases— where worlds  
379 meet. *N Engl J Med*. 2010; 363:1196–1198.
- 380 2. The global burden of disease: 2004 update. Geneva: World Health Organization; 2008.
- 381 3. Global status report on noncommunicable diseases 2010. Geneva: World Health  
382 Organization; 2011
- 383 4. Omran AR. The epidemiological transition: a theory of the epidemiology of  
384 population change. *Milbank Mem Fund Q*. 1971;4: 509–538.
- 385 5. Global action plan for the prevention and control of NCDs 2013-2020. Geneva: World  
386 Health Organization; 2013.

- 387 6. Mills KT, Bundy JD, Kelly TN, et al. Global disparities of hypertension prevalence  
388 and control clinical perspective. *Circulation* 2016; 134:441
- 389 7. Yusuf S, Reddy S, Ôunpuu S, Anand S. Global burden of cardiovascular diseases:  
390 part I: general considerations, the epidemiologic transition, risk factors, and impact  
391 of urbanization. *Circulation*. 2001 Nov 27;104(22):2746–53.
- 392 8. Viera AJ, Cohen LW, Mitchell CM, Sloane PD. High blood pressure knowledge  
393 among primary care patients with known hypertension: a North Carolina Family  
394 Medicine Research Network (NC-FM-RN) study. *J Am Board Fam Med*.  
395 2008;21(4):300–8.
- 396 9. Heller DJ, Kishore SP. Closing the blood pressure gap: an affordable proposal to save  
397 lives worldwide. *BMJ Glob Health*. 2017 09 25;2(3)
- 398 10. Oliveria SA, Chen RS, McCarthy BD, Davis CC, Hill MN. Hypertension Knowledge,  
399 Awareness, and Attitudes in a Hypertensive Population. *Journal of General Internal  
400 Medicine*. 2005;20(3):219-225.
- 401 11. World Health Organization (WHO): 'Non-communicable Diseases surveillance'.  
402 2013. [www.who.int/ncd\\_surveillance/en/](http://www.who.int/ncd_surveillance/en/) Accessed 04 April 2018
- 403 12. Kearney PM, Whelton M, Reynolds K, Muntner P, Whelton PK, He J. Global burden  
404 of hypertension: analysis of worldwide data. *Lancet*. 2005; 365:217-223.
- 405 13. Agyemang C, Bhopal R, Bruijnzeels M: Do variations in blood pressures of South  
406 Asian, African and Chinese descent children reflect those of the adult populations in  
407 the UK? A review of cross-sectional data. *J Hum Hypertens* 2004, 18:229–237

- 408 14. Mutowo MP, Mangwiro JC, Lorgelly P, Owen A, Renzaho AM. Hypertension in  
409 Zimbabwe: A meta-analysis to quantify its burden and policy implications. *World J*  
410 *Meta-Anal* 2015; 3(1): 54-60
- 411 15. Marwiro A. Prevalence and Risk Factors for Hypertension among Bulawayo City  
412 Council Employees. 2012
- 413 16. Hakim JG, Mujuru N, Rusakaniko S, Gomo ZAR. WHO STEPS Survey Zimbabwe.  
414 Available from: [http://www.who.int/chp/steps/STEPS\\_Zimbabwe\\_Data.pdf](http://www.who.int/chp/steps/STEPS_Zimbabwe_Data.pdf) 2005
- 415 17. Mash B. African Primary Care Research: Participatory action research. *Afr J Prm*  
416 *Health Care Fam Med*. 2014;6(1).
- 417 18. Baum F, MacDougall C, Smith D. Participatory action research. *Journal of*  
418 *Epidemiology and Community Health*. 2006;60(10)
- 419 19. Vivian E.M. Strategies and Considerations for Community-Based Participatory  
420 Research in the Prevention of Type 2 Diabetes in Youth, *Diabetes Spectrum*; Oct 2010,  
421 23 (4) 213-215
- 422 20. Zimbabwe National Statistics Agency, Census 2012, Provincial Report, Matebeleland  
423 South  
424 <http://www.zimstat.co.zw/sites/default/files/img/publications/Census/CensusResults>  
425 [2012/Mat South.pdf](http://www.zimstat.co.zw/sites/default/files/img/publications/Census/CensusResults) Accessed 29 January 2018
- 426 21. James Kayima, Rhoda K Wanyenze, Achilles Katamba, Elli Leontsini and Fred  
427 Nuwaha: Hypertension awareness, treatment and control in Africa: a systematic  
428 review. *BMC Cardiovascular Disorders*. 2013, 13:54 <https://doi.org/10.1186/1471->  
429 2261-13-54

- 430 22. Ministry of Health and Child Welfare, Zimbabwe. National Health Strategy for  
431 Zimbabwe 2009-2013: Equity and Quality in Health: A People's Right. 2009
- 432 23. Chow CK, Teo KK, Rangarajan S, Islam S, Gupta R, Avezum A, et al. Prevalence,  
433 awareness, treatment, and control of hypertension in rural and urban communities  
434 in high-, middle-, and low-income countries. *JAMA*. 2013; 310(9):959–968.
- 435 24. Matenga JA, Allain TJ, Wilson AO, Adamchek DJ, Senzanje B, Mushangi E and  
436 Gomo Z. Hypertension management in Zimbabwe-awareness, treatment and blood  
437 pressure control. *SAfr Med J* 1997; 87(10): 1371-3.
- 438 25. Agyemang C. Rural and urban differences in blood pressure and hypertension in  
439 Ghana, west Africa. *Public Health*. 2006; 120(6):525–533.
- 440 26. Rao V, Daniel A. Application of the “rule of halves” for hypertension as an assessment  
441 tool in an urban slum at davangere. *Natl J Community Med*. 2014; 5(3):333–336.
- 442 27. Mohan V, Deepa M, Farooq S, Datta M, Deepa R. Prevalence, awareness and control  
443 of hypertension in Chennai—the Chennai urban rural epidemiology study (cures-52).  
444 *J Assoc Physicians India*. 2007; 55:326–332.
- 445 28. Miranda JJ, Kinra S, Casas JP, Davey Smith G, Ebrahim S. Non-communicable  
446 diseases in low- and middle-income countries: context, determinants and health  
447 policy. *Trop Med Int Health*. 2008; 13:1225-1234
- 448 29. Lloyd-Sherlock P, Beard J, Minicuci N, Ebrahim S, Chatterji S. Hypertension among  
449 older adults in low- and middle-income countries: prevalence, awareness and  
450 control. *Int J Epidemiol*. 2014; 43:116-128

- 451 30. Pires JE, Sebastiao YV, Langa AJ, Nery SV: Hypertension in Northern Angola:  
452 prevalence, associated factors, awareness, treatment and control. BMC Publ Health.  
453 2013, 13 (1): 90-10.1186/1471-2458-13-90.
- 454 31. Ulasi II, Ijoma CK, Onwubere BJ, Arodiwe E, Onodugo O, Okafor C: High prevalence  
455 and low awareness of hypertension in a market population in Enugu, Nigeria. Int J  
456 Hypertens. 2011, 27 (869675): 869675.
- 457 32. Atim C, Fleisher LK, Hatt L, Musau S, Arur A: Health Financing in Africa Today:  
458 Challenges and Opportunities. 2008, Washington, DC: Africa's Health, Academy for  
459 Educational Development, and Bethesda, MD: Health Systems 20/20 Project
- 460 33. Chimberengwa PT, Naidoo M. A description of community-based participatory  
461 research of hypertension awareness, prevention and treatment in a district of  
462 Matabeleland South Province, Zimbabwe. Afr J Prm Health Care Fam Med.  
463 2019;11(1), a1839. [https://doi.org/10.4102/ phcfm.v11i1.1839](https://doi.org/10.4102/phcfm.v11i1.1839)  
464  
465
